# Supplementary material for: Reprogramming of Urine-Derived Renal Epithelial Cells into iPSCs Using srRNA and Consecutive Differentiation into Beating Cardiomyocytes
Source: PubMed Central journal article supplement — Mol Ther Nucleic Acids. 2019 Jul 31;17:907–21. doi: 10.1016/j.omtn.2019.07.016 (PMC6723182; doi:10.1016/j.omtn.2019.07.016), 2019-07-31
Supplement: mmc1.pdf [file mmc1.pdf]

OMTN, Volume 17

## **Supplemental Information**

### **Reprogramming of Urine-Derived Renal Epithelial Cells into iPSCs Using srRNA and Consecutive Differentiation into Beating Cardiomyocytes**

**Heidrun Steinle, Marbod Weber, Andreas Behring, Ulrike Mau-Holzmann, Christiane von Ohle, Aron-Frederik Popov, Christian Schlensak, Hans Peter Wendel, and Meltem Avci-Adali**

## SUPPLEMENTARY DATA

**TABLE 1**

**Table 1: List of primers used for qRT-PCR analysis.**

| Gene                         | Forward primer (5'→3') | Reverse primer (5'→3') |
|------------------------------|------------------------|------------------------|
| <b>pluripotency marker</b>   |                        |                        |
| GAPDH                        | TCAACAGCGACACCCACTCC   | TGAGGTCCACCACCCTGTTG   |
| Oct4 <sup>33</sup>           | AGCGAACCAGTATCGAGAAC   | TTACAGAACCACACTCGGAC   |
| Sox2 <sup>33</sup>           | AGCTACAGCATGATGCAGGA   | GGTCATGGAGTTGTACTGCA   |
| Nanog <sup>33</sup>          | TGAACCTCAGCTACAAACAG   | TGGTGGTAGGAAGAGTAAAG   |
| Lin28                        | CTTCTTCTCCGAACCAACC    | CAGCCACCTGCAAACCTG     |
| E-Cadherin                   | TATACCCTGGTGGTTCAAGC   | CACCTGACCCTTGTACGTG    |
| Klf4 <sup>33</sup>           | TCTCAAGGCACACCTGCGAA   | TAGTGCCTGGTCAGTTCATC   |
| cMyc <sup>33</sup>           | ACTCTGAGGAGGAACAAGAA   | TGGAGACGTGGCACCTCTT    |
| <b>srRNA specific marker</b> |                        |                        |
| nsP2                         | TCCACAAAAGCATCTCTCGCCG | TTTGCAACTGCTTCACCCACCC |
| nsP4                         | TTTTCAAGCCCCAAGGTCGCAG | TGTTCTGGATCGCTGAAGGCAC |
| <b>cardiomyocyte marker</b>  |                        |                        |
| ANP                          | CAGACCAGAGCTAATCCCAT   | GTCCAGCAAATTCTTGAAATCC |
| cTnT                         | TTACATCCAGAAGACAGAGCG  | TCTCCCTCAGCTGATCTTCAT  |
| MHC6                         | GAAGCACCAAGATGACCGATG  | CTCTGACTTGCGGAGGTACT   |
| ACTC1                        | ATGTGTGACGACGAGGAGAC   | ACCCACCATAACTCCCTGGT   |

**Abbreviations:** GAPDH: Glyceraldehyde-3-phosphate dehydrogenase, Oct4: Octamer binding transcription factor 4, Sox2: Sex determining region Y-box 2, E-Cadherin: Epithelial cadherin, Klf4: Krüppel-like factor 4, c-Myc: Cancer myelocytomatosis, nsP: Non-structural protein, ANP: Atrial natriuretic peptide, cTnT: Cardiac troponin T, MHC6: Myosin heavy chain 6, ACTC:  $\alpha$ -actin, cardiac muscle.

## SUPPLEMENTARY FIGURES

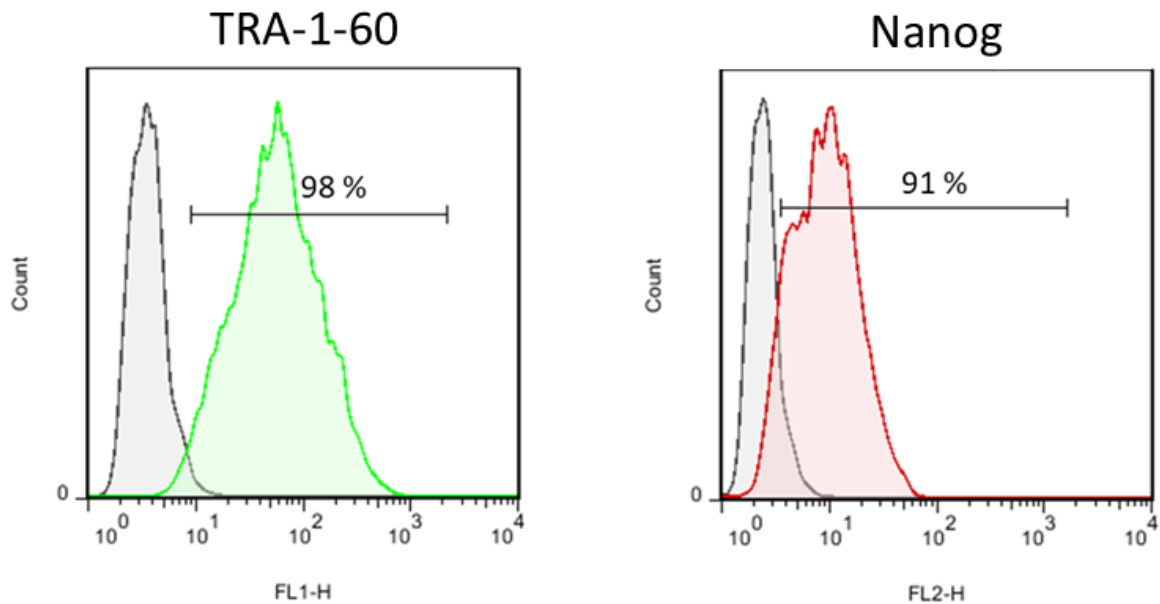

**Supplementary Figure 1:** Pluripotency marker analysis of REC-iPSCs at passage 25 after initial picking. Flow cytometric measurement of TRA-1-60 and Nanog stained cells.

### VIDEO 1

**Characterization of contracting cardiomyocytes:** Recordings of 30 s (7 pictures/s) showing wide ranges of motion and directional synchronous contractions. Direction is indicated by arrows using Matlab application Motion GUI.

### VIDEO 2

**Calcium ion staining of contractile cardiomyocytes:** Fluorescent calcium indicators were used to visualize the intracellular calcium flux during contraction. Recordings of 30 s (7 pictures/s) showing Ca<sup>2+</sup> transients in the cardiomyocyte culture.
